# Supplementary material
Source: ML conference proceedings conference paper supplement (https://openaccess.thecvf.com/content/CVPR2022/html/Hatamizadeh_GradViT_Gradient_Inversion_CVPR_2022_paper.html)
Supplement: Supplementary file 1 [file Hatamizadeh_GradViT_Gradient_Inversion_CVPR_2022_supplemental.zip]

Archive with 3 entries (2 files):
- 00093-supp/
- 00093-supp/00093-supp.pdf
- 00093-supp/00093-supp.mp4
